# Supplementary material for: Solvent control of optical resolution of 2-amino-1-phenylethanol using dehydroabietic acid
Source: Royal Society of Chemistry journal article supplement (doi:10.1039/b717071h), 2007-12-18
Supplement: b717071h.pdf [file b717071h.pdf]

## **Solvent control of optical resolution of 2-amino-1-phenylethanol using dehydroabietic acid**

**Kayoko Taniguchi,<sup>\*a,b</sup> Marie Aruga,<sup>a</sup> Mikio Yasutake<sup>a</sup> and Takuji Hirose<sup>\*a</sup>**

<sup>a</sup> Graduate School of Science and Engineering, Saitama University, Shimo-Ohkubo 255, Sakura-ku, Saitama, Saitama 338-8570, Japan, <sup>b</sup> Eco-Soft Materials Research Unit, RIKEN (The Institute of Physical and Chemical Research), Hirosawa 2-1, Wako, Saitama 351-0198, Japan.

E-mail: [hirose@apc.saitama-u.ac.jp](mailto:hirose@apc.saitama-u.ac.jp); [kytaniguchi@riken.jp](mailto:kytaniguchi@riken.jp)

### **Contents:**

|                                                                             |    |
|-----------------------------------------------------------------------------|----|
| 1. Solvent dependency of molar rotation of enantiomers and the chiral salts | S2 |
| 2. Solvent dependency of molar rotation of diastereomeric salts             | S3 |
| 3. Hydrogen bonding geometry of diastereomeric salts                        | S4 |

### 1. Solvent dependency of molar rotation of enantiomers and the chiral salts

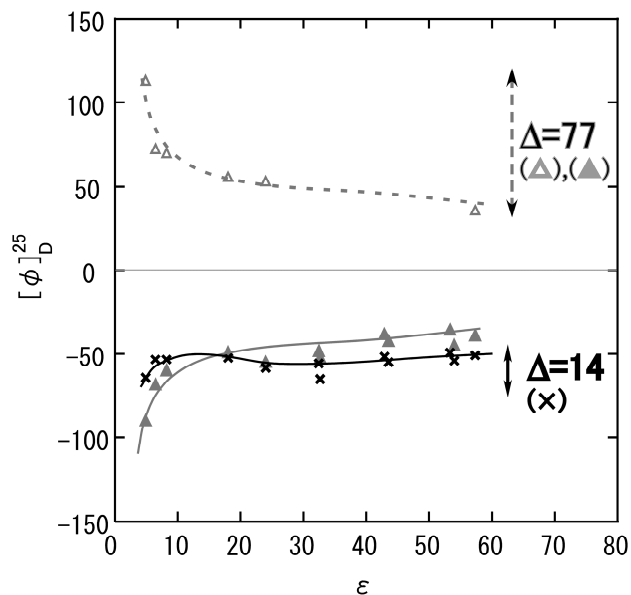

**Fig. S1** Solvent dependency of molar rotation of  $(R)\text{-1}$  and  $(S)\text{-1}$  and the chiral salt with  $\text{CH}_3\text{COOH}$  ( $1/\text{CH}_3\text{COOH}$ ).  $(R)\text{-1}$  ( $\blacktriangle$ ),  $(S)\text{-1}$  ( $\triangle$ ), and  $1/\text{CH}_3\text{COOH}$  ( $\times$ ).

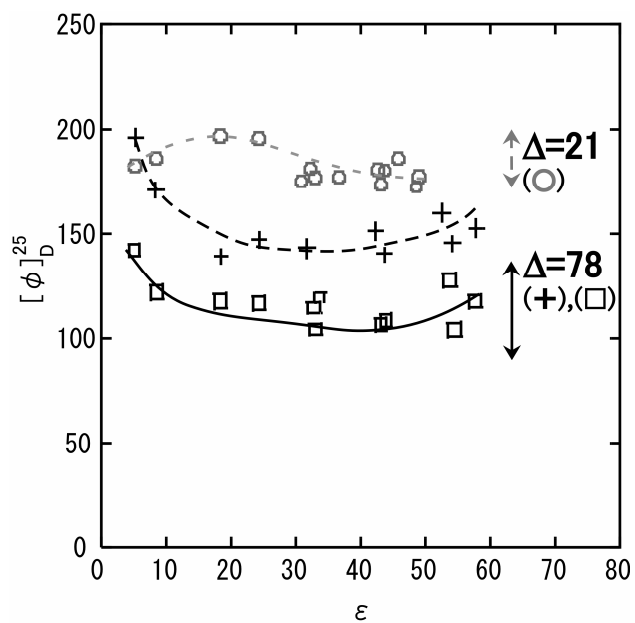

**Fig. S2** Solvent dependency of molar rotation of  $2$  and the chiral salt with  $2\text{-AE}$  ( $2\text{-AE}/2$ ) and  $2\text{-PrNH}_2$  ( $2\text{-PrNH}_2/2$ ).  $2$  ( $\circ$ ),  $2\text{-AE}/2$  ( $+$ ),  $2\text{-PrNH}_2/2$  ( $\square$ ).

## 2. Solvent dependency of molar rotation of diastereomeric salts

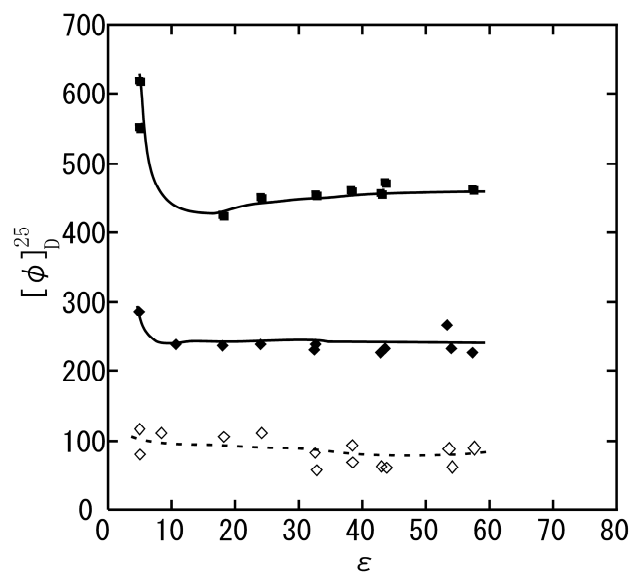

**Fig. S3** Solvent dependence of molar rotation of the diastereomeric salts ((*R*)-**1/2** and (*S*)-**1/2**). (*R*)-**1/2** ( $\diamond$ ), (*S*)-**1/2** (1:1) ( $\blacklozenge$ ), (*S*)-**1/2** (1:2) ( $\blacksquare$ ).

### 3. Hydrogen bonding geometry of the diastereomeric salts

**Table S1** Hydrogen bonding geometry of the (*R*)-1/2 salt.

| D-H (Å) | D...A (Å) | H...A (Å) | D-H...A (°) | *Sym. |
|---------|-----------|-----------|-------------|-------|
| O4-H40  | O4...O2   | H40...O2  | O4-H40...O2 | (1)   |
| 0.84    | 2.709(4)  | 1.88      | 170         |       |
| N1-H30  | N1...O2   | H30...O2  | N1-H30...O2 | (2)   |
| 0.91    | 2.787(5)  | 1.93      | 155         |       |
| O3-H31  | O3...O4   | H31...O4  | O3-H31...O4 | (3)   |
| 0.84    | 2.714(5)  | 1.88      | 176         |       |
| N1-H28  | N1...O1   | H28...O1  | N1-H28...O1 | (4)   |
| 0.91    | 2.789(4)  | 1.90      | 166         |       |
| N1-H29  | N1...O1   | H29...O1  | N1-H29...O1 | (1)   |
| 0.91    | 2.721(5)  | 1.82      | 169         |       |

\* (1) +x, +y, +z; (2) +x, -1+y, +z; (3) 1-x, -3/2+y, 1-z; (4) 1-x, -1/2+y, 1-z.

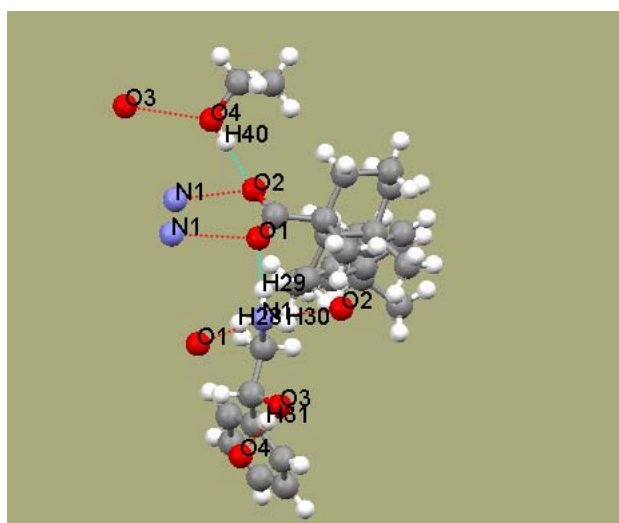

**Fig. S4** Hydrogen bonding geometry of the (*R*)-1/2 salt.

**Table S2** Hydrogen bonding geometry of the (*S*)-1/2 (1:2) salt.

| D-H (Å) | D...A (Å) | H...A (Å) | D-H...A (°) | *Sym. |
|---------|-----------|-----------|-------------|-------|
| N1-H1   | N1...O2   | H1...O2   | N1-H1...O2  | (1)   |
| 0.91    | 2.788(5)  | 1.88      | 172         |       |
| N1-H2   | N1...O3   | H2...O3   | N1-H2...O3  | (2)   |
| 0.91    | 2.655(6)  | 1.87      | 144         |       |
| O5-H67  | O5...O2   | H67...O2  | O5-H67...O2 | (3)   |
| 0.84    | 2.582(5)  | 1.75      | 173         |       |
| O1-H7   | O1...O4   | H7...O4   | O1-H7...O4  | (5)   |
| 0.84    | 2.695(6)  | 1.91      | 155         |       |
| N1-H3   | N1...O2   | H3...O2   | N1-H3...O2  | (4)   |
| 0.91    | 3.049(5)  | 2.29      | 141         |       |

\*(1) 1+ x, +y, +z; (2) +x, +y, +z; (3) -x, -1/2+y, 1/2-z; (4) 1/2+x, 3/2-y, -z; (5) 3/2-x, 1-y, -1/2+z.

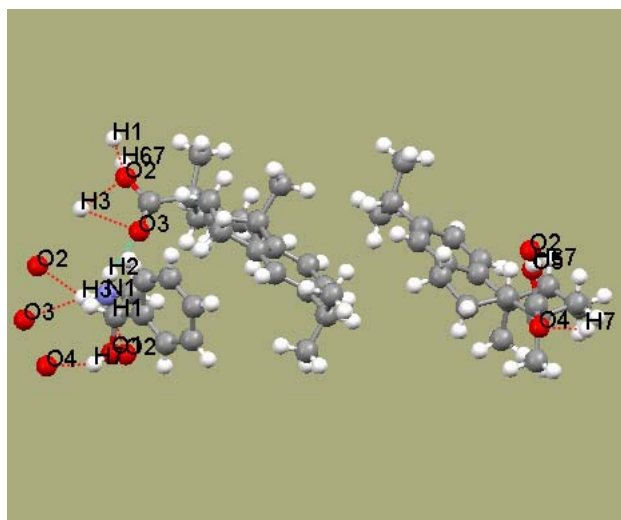**Fig. S5** Hydrogen bonding geometry of the (*S*)-1/2 (1:2) salt.

**Table S3** Hydrogen bonding geometry of the (*S*)-1/2 (1:1) salt.

| D-H (Å) | D··A (Å) | H··A (Å) | D-H··A (°) | *Sym. |
|---------|----------|----------|------------|-------|
| N1-H38  | N1··O1   | H38··O1  | N1-H38··O1 | (1)   |
| 0.91    | 2.729(3) | 1.82     | 174        |       |
| N1-H39  | N1··O2   | H39··O2  | N1-H39··O2 | (2)   |
| 0.91    | 2.764(3) | 1.86     | 170        |       |
| N1-H37  | N1··O2   | H37··O2  | N1-H37··O2 | (3)   |
| 0.91    | 2.744(3) | 1.84     | 175        |       |
| O3-H34  | O3··O1   | H34··O1  | O3-H34··O1 | (2)   |
| 0.84    | 2.884(3) | 2.09     | 159        |       |

\*(1) +x, +y, +z; (2) 1-x, -1/2+y, 1-z; (3) +x, -1+y, +z.

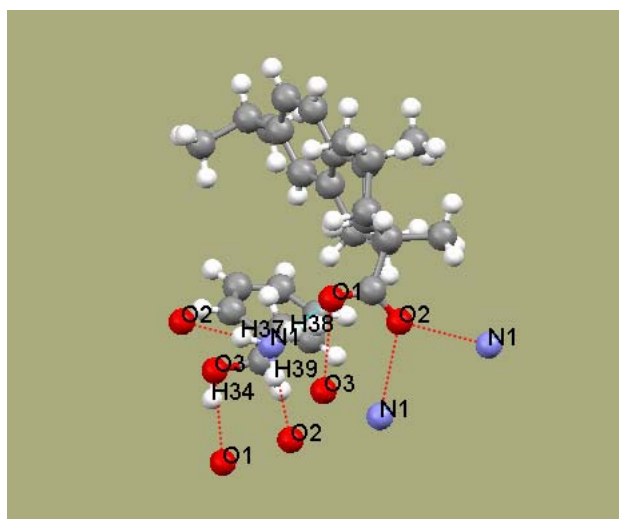**Fig. S6** Hydrogen bonding geometry of the (*S*)-1/2 (1:1) salt.
